# Supplementary material
Source: Springer Nature journal article supplement (https://www.springermedizin.de/resource/supplementary/13601_2014_1058_MOESM3_ESM.pdf/9678622)
Supplement: MOESM3 [file 9678622]

**Additional File 3: Definitions in the ten most cited and the ten most recent papers from the 117 included by Average citations per year at the end of 2013.**

| First Author                  | Year | Journal                                                        | Times cited | Average citations per year | Current Asthma                                                                                                                                                                                                                                      | Lifetime Asthma                                                                                                 | Diagnosed Asthma                                                                                   |
|-------------------------------|------|----------------------------------------------------------------|-------------|----------------------------|-----------------------------------------------------------------------------------------------------------------------------------------------------------------------------------------------------------------------------------------------------|-----------------------------------------------------------------------------------------------------------------|----------------------------------------------------------------------------------------------------|
| <b>Ten most cited papers</b>  |      |                                                                |             |                            |                                                                                                                                                                                                                                                     |                                                                                                                 |                                                                                                    |
| Pearce, N.                    | 2007 | Thorax                                                         | 291         | 41.57                      |                                                                                                                                                                                                                                                     | Ever had asthma                                                                                                 |                                                                                                    |
| Asher, M. I.                  | 1998 | European Respiratory Journal                                   | 644         | 40.25                      |                                                                                                                                                                                                                                                     | Ever had asthma                                                                                                 |                                                                                                    |
| Akinbami, L. J.               | 2002 | Pediatrics                                                     | 408         | 34.00                      | Asthma in the last 12 months                                                                                                                                                                                                                        |                                                                                                                 |                                                                                                    |
| Burney, P.                    | 1996 | European Respiratory Journal                                   | 514         | 28.56                      | Asthma attack or currently taking asthma medication                                                                                                                                                                                                 |                                                                                                                 |                                                                                                    |
| Burr, M. L.                   | 1989 | Archives Of Disease In Childhood                               | 644         | 25.76                      | Ever had asthma and wheeze in the last 12 months                                                                                                                                                                                                    |                                                                                                                 |                                                                                                    |
| Burney, P. G. J.              | 1990 | British Medical Journal                                        | 482         | 20.08                      | Asthma in the last 12 months                                                                                                                                                                                                                        |                                                                                                                 |                                                                                                    |
| Moorman, J. E.                | 2011 | Morbidity And Mortality Weekly Report. Surveillance Summaries  | 59          | 19.67                      | Diagnosed with asthma by a physician and still have asthma                                                                                                                                                                                          |                                                                                                                 |                                                                                                    |
| Vonmutius, E.                 | 1992 | British Medical Journal                                        | 331         | 15.05                      |                                                                                                                                                                                                                                                     |                                                                                                                 | Ever diagnosed with asthma by a physician or health professional                                   |
| Gergen, P. J.                 | 1988 | Pediatrics                                                     | 383         | 14.73                      |                                                                                                                                                                                                                                                     |                                                                                                                 | Diagnosed with asthma by a physician or wheezing in the last 12 months, apart from cold or the flu |
| Robertson, C. F.              | 1991 | British Medical Journal                                        | 313         | 13.61                      |                                                                                                                                                                                                                                                     | Ever had asthma                                                                                                 |                                                                                                    |
| <b>Ten most recent papers</b> |      |                                                                |             |                            |                                                                                                                                                                                                                                                     |                                                                                                                 |                                                                                                    |
| Hansen, T. E.                 | 2013 | Acta Paediatrica                                               | 2           | 2                          |                                                                                                                                                                                                                                                     | Ever had asthma and/or one of the following: wheeze, cough or acute shortness of breath due to external factors |                                                                                                    |
| de Marco, R.                  | 2013 | Plos One                                                       | 1           | 1                          |                                                                                                                                                                                                                                                     |                                                                                                                 | Ever had asthma and medical confirmation                                                           |
| Kim, S. Y.                    | 2013 | Lung                                                           | 1           | 1                          |                                                                                                                                                                                                                                                     |                                                                                                                 | Ever diagnosed with asthma by a physician or health professional                                   |
| Kainu, A.                     | 2013 | Primary Care Respiratory Journal                               | 1           | 1                          |                                                                                                                                                                                                                                                     |                                                                                                                 | Ever diagnosed with asthma by a physician or health professional                                   |
| Agrawal, S.                   | 2013 | International Journal Of Tuberculosis And Lung Disease         | 0           | 0                          | Asthma in the last 12 months                                                                                                                                                                                                                        |                                                                                                                 |                                                                                                    |
| Broms, K.                     | 2013 | BMC Public Health                                              | 0           | 0                          | At least one of the following: 1) Ever had asthma and wheezing in the last 12 months or 2) wheezing 4 times or more during the last 12 months or 3) physician diagnosis and wheezing in the last 12 months or 4) current use of inhalation steroids |                                                                                                                 |                                                                                                    |
| de Luna, M. d. F. G.          | 2013 | Jornal Brasileiro De Pneumologia                               | 0           | 0                          | Wheeze in the last 12 months                                                                                                                                                                                                                        |                                                                                                                 |                                                                                                    |
| Jie, Y.                       | 2013 | Polish Journal Of Environmental Studies                        | 0           | 0                          |                                                                                                                                                                                                                                                     |                                                                                                                 | Diagnosed with asthma by a physician in the last 12 months                                         |
| To, T.                        | 2012 | BMC Public Health                                              | 22          | 11                         |                                                                                                                                                                                                                                                     |                                                                                                                 | Ever diagnosed with asthma by a physician or health professional                                   |
| Sanchez-Lerma, B.             | 2012 | Journal Of Investigational Allergology And Clinical Immunology | 8           | 4                          | Wheeze in the last 12 months                                                                                                                                                                                                                        |                                                                                                                 |                                                                                                    |
